# Supplementary material for: Microbiota Associated With Cholesteatoma Tissue in Chronic Suppurative Otitis Media
Source: PubMed Central journal article supplement (PMC9063009; doi:10.3389/fcimb.2022.746428), 2022-04-19
Supplement: DataSheet_1.pdf [file DataSheet_1.pdf]

**Table S1. Primers Used for Viral Screening**

| <i>Virus</i>                | <i>Abbr.</i> | <i>Gene</i>              | <i>Forward Primer</i>          | <i>Reverse Primer</i>         |
|-----------------------------|--------------|--------------------------|--------------------------------|-------------------------------|
| HPV-E6                      | HPV          | Oncoprotein E6           | TCAGGACCCACAGGAGCG             | CCTCACGTCGCAGTAACTGTTG        |
| HPV-E7                      | HPV          | Early protein E7         | CCGGACAGAGCCCATTACAA           | CGAATGTCTACGTGTGTGCTTTG       |
| HPV-GP5/6                   | HPV          | Late major capsid L1     | GAAAAATAAACTGTAAATCATATT       | TTTGTTACTGTGGTAGATACTAC       |
| Adenovirus                  | HAdV         | Hexon                    | GCCACGGTGGGGTTTCTAAACTT        | GCCCCAGTGGTCTTACATGCACAT      |
| Human Bocavirus NS-1        | HBoV         | Non-structural protein 1 | TGCAGACAACGCYTAGTTGTTT         | CTGTCCCGCCCAAGATACA           |
| Rhinovirus                  | RV           | Genome/5'UTR             | TGGACAAGGTGCGAAGAG             | CAAAGTAGTCGGTCCCATCC          |
| Influenza B                 | InfB         | Segment 4 hemagglutinin  | AAATACGGTGGATTAATAAAAAGCAA     | CCAGCAATAGCTCCGAAGAAA         |
| Influenza A                 | InfA         | Matrix proteins 1 & 2    | GACCRATCCTGTACCTCTGAC          | AGGGCATTYTGACAAAKCGTCTA       |
| Human Metapneumovirus       | hMPV         | Nucleocapsid             | CATATAAGCATGCTATATTAAGAGTCTCA  | CCTATTTCTGCAGCATATTTGTAATCAG  |
| Respiratory Syncytial Virus | RSV          | cRNA/genome              | GCTCTTAGCAAAGTCAAGTTRAATGATACA | GTTTTTGCACATCATAATTRGGAGT     |
| Enterovirus                 | EV           | Polyprotein              | GGCCCCTGAATGCGGCTAATCC         | GCGATTGTCACCATWAGCAGYCA       |
| Human Coronavirus-229E      | hCoV         | Nucleoprotein            | CAGTCAAATGGGCTGATGCA           | AAAGGGCTATAAAGAGAATAAGGTATTCT |
| hCoV-OC43                   | hCoV         | Nucleocapsid             | CGATGAGGCTATTCCGACTAGGT        | CCTTCCTGAGCCTTCAATATAGTAACC   |
| hCoV-NL63                   | hCoV         | Nucleocapsid             | AGGACCTTAAATTCAGACAACGTTCT     | GATTACGTTTTCGATTACCAAGACT     |
| Beta-actin-2 (control)      | β-actin      | Exon 4                   | TCACCCACACTGTGCCCATCTACGA      | CAGCGGAACCGCTCATTGCCAATG      |

**Table S2. Most Prevalent Cholesteatoma-associated Bacteria (showing all taxa found in >50% of Cholesteatomas)**

| Taxon                                  | Prevalence   |              |               |                | Mean Abundance (s.d.) |              |              |              | Phylum         |
|----------------------------------------|--------------|--------------|---------------|----------------|-----------------------|--------------|--------------|--------------|----------------|
|                                        | CHOL<br>N=25 | GRAN<br>N=34 | MEMUC<br>N=17 | MEDISC<br>N=27 | CHOL                  | GRAN         | MEMUC        | MEDISC       |                |
| <i>Bact:Porphyromonas</i>              | 100          | 91           | 82            | 89             | 8.32 (12.05)          | 5.23 (10.00) | 6.34 (10.36) | 7.12 (13.67) | Bacteroidetes  |
| <i>Firm:Streptococcus</i>              | 96           | 94           | 100           | 93             | 0.20 (0.67)           | 0.95 (1.61)  | 2.00 (4.18)  | 0.47 (1.00)  | Firmicutes     |
| <i>Fuso:Fusobacterium</i>              | 92           | 71           | 76            | 89             | 2.04 (3.97)           | 0.68 (1.35)  | 1.17 (2.45)  | 2.04 (5.09)  | Fusobacteria   |
| <i>Firm:Peptoniphilus</i>              | 92           | 91           | 88            | 96             | 7.27 (9.76)           | 5.84 (10.57) | 5.54 (9.15)  | 3.05 (4.81)  | Firmicutes     |
| <i>Prot:Gammaproteobacteria</i>        | 88           | 91           | 88            | 96             | 0.60 (1.98)           | 6.96 (11.92) | 5.69 (6.74)  | 4.02 (10.10) | Proteobacteria |
| <i>Prot:Pseudomonas</i>                | 88           | 94           | 100           | 81             | 2.30 (6.04)           | 2.72 (4.44)  | 0.84 (1.07)  | 1.11 (2.42)  | Proteobacteria |
| <i>Prot:Haemophilus</i>                | 84           | 85           | 88            | 96             | 0.03 (0.08)           | 0.29 (0.61)  | 0.30 (0.67)  | 0.07 (0.20)  | Proteobacteria |
| <i>Firm:Staphylococcus</i>             | 84           | 88           | 76            | 93             | 7.95 (22.15)          | 6.20 (17.55) | 7.22 (17.28) | 5.11 (13.57) | Firmicutes     |
| <i>Bact:Prevotella</i>                 | 84           | 76           | 76            | 81             | 0.98 (2.22)           | 1.13 (2.74)  | 0.97 (1.52)  | 2.13 (5.69)  | Bacteroidetes  |
| <i>Acti:Propionibacterium</i>          | 84           | 91           | 100           | 89             | 0.34 (1.04)           | 6.19 (8.94)  | 5.10 (5.03)  | 4.68 (12.26) | Actinobacteria |
| <i>Acti:Corynebacterium</i>            | 80           | 94           | 88            | 100            | 11.53 (26.79)         | 5.63 (13.77) | 2.08 (2.30)  | 7.87 (16.28) | Actinobacteria |
| <i>Prot:Alcaligenaceae</i>             | 80           | 85           | 88            | 78             | 4.67 (11.75)          | 1.56 (3.74)  | 2.00 (4.94)  | 2.71 (6.89)  | Proteobacteria |
| <i>Acti:Brevibacterium</i>             | 80           | 76           | 76            | 78             | 3.68 (6.81)           | 1.67 (4.59)  | 2.23 (4.34)  | 5.62 (12.74) | Actinobacteria |
| <i>Firm:Parvimonas</i>                 | 80           | 82           | 82            | 70             | 3.58 (7.88)           | 2.46 (6.93)  | 1.19 (2.82)  | 3.24 (6.42)  | Firmicutes     |
| <i>Bact:Bacteroides</i>                | 80           | 79           | 88            | 78             | 2.23 (3.77)           | 2.31 (3.81)  | 3.17 (4.09)  | 3.25 (7.23)  | Bacteroidetes  |
| <i>Prot:Enterobacteriaceae</i>         | 80           | 85           | 88            | 89             | 3.28 (8.87)           | 2.11 (7.29)  | 5.29 (15.19) | 4.06 (10.86) | Proteobacteria |
| <i>Firm:Anaerococcus</i>               | 80           | 62           | 65            | 74             | 1.04 (3.00)           | 0.67 (1.65)  | 2.27 (6.20)  | 0.48 (1.42)  | Firmicutes     |
| <i>Prot:Pseudomonadales</i>            | 76           | 79           | 82            | 74             | 7.16 (21.60)          | 8.96 (19.36) | 3.67 (12.16) | 5.25 (17.19) | Proteobacteria |
| <i>Prot:Moraxella</i>                  | 72           | 59           | 65            | 85             | 0.01 (0.02)           | 0.17 (0.78)  | 0.37 (1.01)  | 0.12 (0.53)  | Proteobacteria |
| <i>Acti:Actinomyces</i>                | 72           | 76           | 82            | 70             | 0.40 (1.40)           | 0.33 (0.55)  | 0.30 (0.47)  | 0.40 (0.84)  | Actinobacteria |
| <i>Firm:Bacillus</i>                   | 72           | 91           | 100           | 63             | 0.10 (0.33)           | 1.60 (2.56)  | 1.97 (3.01)  | 0.83 (2.15)  | Firmicutes     |
| <i>Prot:Proteus</i>                    | 72           | 56           | 65            | 78             | 1.48 (3.42)           | 1.25 (3.23)  | 1.97 (4.40)  | 2.84 (7.27)  | Proteobacteria |
| <i>Prot:Escherichia</i>                | 68           | 71           | 88            | 67             | 0.19 (0.48)           | 0.36 (0.69)  | 0.86 (1.17)  | 0.80 (1.90)  | Proteobacteria |
| <i>Firm:Finegoldia</i>                 | 68           | 68           | 71            | 70             | 1.64 (4.77)           | 1.44 (4.29)  | 1.90 (3.67)  | 1.17 (2.78)  | Firmicutes     |
| <i>Prot:Achromobacter</i>              | 64           | 62           | 59            | 67             | 3.55 (13.01)          | 2.75 (11.46) | 0.29 (0.43)  | 1.45 (6.44)  | Proteobacteria |
| <i>Prot:Campylobacter</i>              | 64           | 59           | 65            | 70             | 1.19 (2.16)           | 1.35 (4.23)  | 0.37 (0.92)  | 0.14 (0.34)  | Proteobacteria |
| <i>Firm:Family-XI-Incertae-Sedis</i>   | 64           | 47           | 53            | 37             | 0.37 (0.73)           | 0.37 (0.92)  | 0.14 (0.21)  | 0.10 (0.28)  | Firmicutes     |
| <i>Prot:Acinetobacter</i>              | 60           | 65           | 76            | 63             | 0.28 (1.33)           | 0.59 (1.43)  | 2.46 (9.05)  | 0.23 (0.50)  | Proteobacteria |
| <i>Firm:Family-XIII-Incertae-Sedis</i> | 60           | 53           | 59            | 59             | 1.25 (3.25)           | 0.58 (1.40)  | 0.41 (0.80)  | 0.24 (0.41)  | Firmicutes     |
| <i>Proteobacteria</i>                  | 60           | 62           | 59            | 63             | 0.01 (0.02)           | 0.06 (0.13)  | 0.15 (0.50)  | 0.03 (0.08)  | Proteobacteria |
| <i>Spir:Treponema</i>                  | 56           | 41           | 47            | 59             | 1.35 (2.81)           | 1.50 (4.04)  | 2.21 (4.25)  | 1.23 (3.24)  | Spirochaetae   |
| <i>Acti:Corynebacteriaceae</i>         | 52           | 68           | 71            | 59             | 0.19 (0.82)           | 0.38 (0.81)  | 0.22 (0.28)  | 0.18 (0.37)  | Actinobacteria |
| <i>Prot:Alcaligenes</i>                | 52           | 32           | 29            | 59             | 0.41 (1.41)           | 1.98 (10.60) | 0.08 (0.25)  | 3.24 (11.10) | Proteobacteria |
| <i>Acti:Mobiluncus</i>                 | 52           | 44           | 71            | 48             | 2.12 (4.84)           | 2.27 (6.81)  | 0.88 (1.97)  | 0.31 (0.66)  | Actinobacteria |

**Table S3. PERMANOVA Results Stratified by Sample-type**

| <b>A. Univariable</b>   | <b>PERMANOVA P-Values</b> |               |               |              |
|-------------------------|---------------------------|---------------|---------------|--------------|
| <b>Variable</b>         | <b>Chol</b>               | <b>Gran</b>   | <b>MEDisc</b> | <b>MEMuc</b> |
| Age                     | 0.19                      | <b>0.004</b>  | 0.34          | 0.20         |
| Cholesteatoma Dx        | na                        | <b>0.0005</b> | <b>0.002</b>  | 0.37         |
| Quinolone               | 0.15                      | <b>0.04</b>   | 0.41          | <b>0.008</b> |
| <b>B. Multivariable</b> | <b>PERMANOVA p-Values</b> |               |               |              |
| <b>Variable</b>         | <b>Chol</b>               | <b>Gran</b>   | <b>MEDisc</b> | <b>MEMuc</b> |
| Age                     | 0.28                      | 0.23          | 0.70          | 0.56         |
| Cholesteatoma Dx        | na                        | <b>0.03</b>   | <b>0.002</b>  | 0.31         |
| Quinolone               | 0.13                      | 0.055         | 0.24          | <b>0.02</b>  |

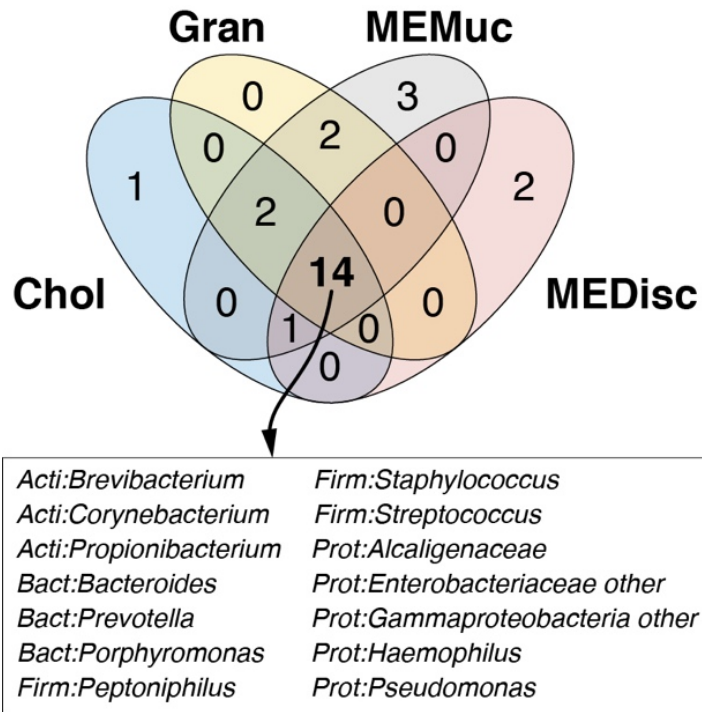

**Figure S1. Overlap in highly prevalent taxa.** Venn diagram shows numbers of taxa detected in  $\geq 75\%$  of patients for each sample-type. The 14 taxa identified in all four sample-types are listed below the diagram. Taxa names are pre-pended with phylum identifiers: Acti = Actinobacterium; Bact = Bacteroidetes; Firm = Firmicutes; Prot = Proteobacteria.

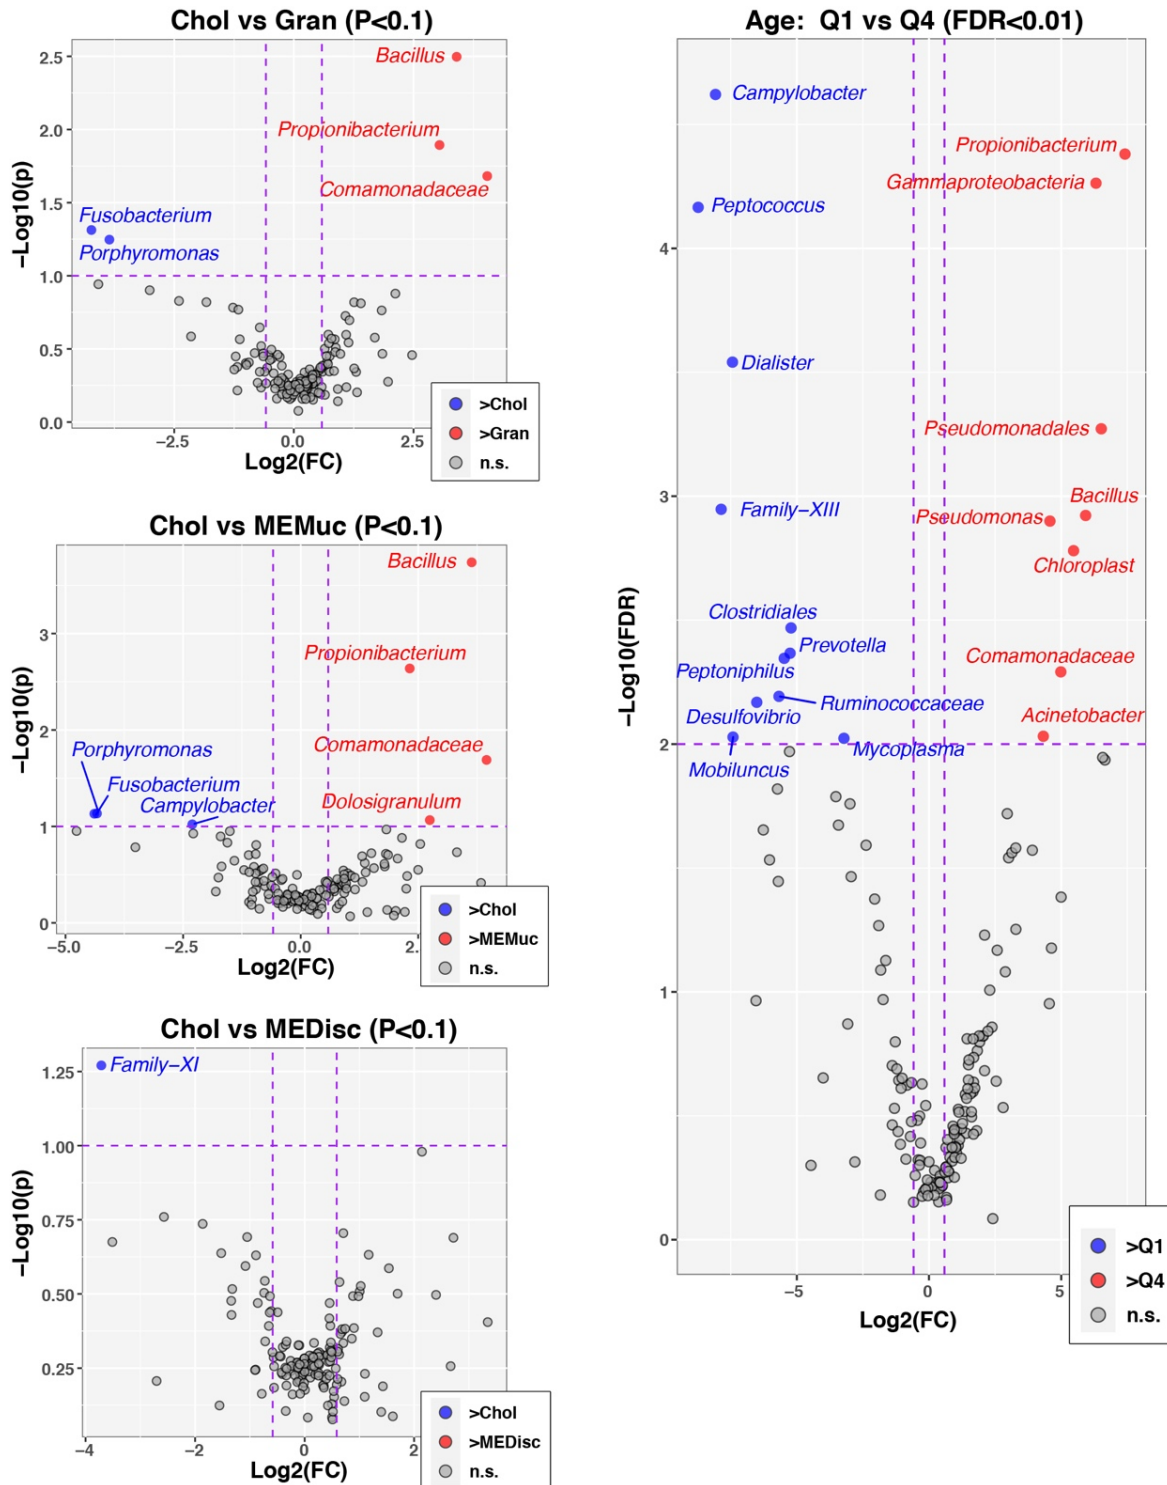

**Figure S2. Individual taxa differing by sample-type or age.** Between-group differences in the relative abundance of individual bacterial taxa were identified using the ANOVA-like differential expression (ALDEx2) test, which considers the compositional nature of microbiota datasets. *Vertical dashed lines* indicate fold-change cutoffs  $\geq 1.5$ . *Horizontal dashed lines* show p-value cutoffs for comparisons of sample-types (Left panels; nominal  $p \leq 0.1$ ) or age quartiles (Right panel; FDR-corrected  $p \leq 0.01$ ). **For sample-type comparisons**, blue circles in the upper left quadrants denote taxa enriched in Chol samples while red circles in the upper right quadrants denote taxa enriched in the other comparison group. **For comparison of age Q1 vs Q4**, blue circles in the upper left quadrants denote taxa enriched in Q1 samples while red circles in the upper right quadrants denote taxa enriched in Q4 samples. n.s.=not significant

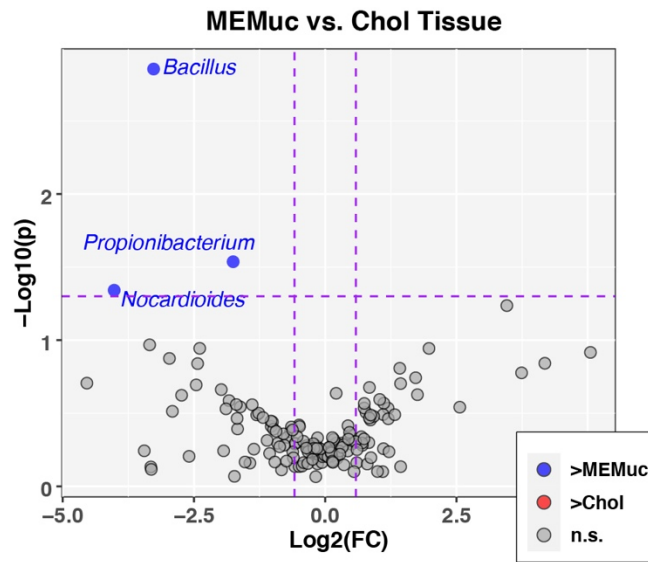

**Figure S3. Individual taxa differing between Chol tissues and other ME sample-types among cholesteatoma patients.** Between-group differences in the relative abundance of individual bacterial taxa were identified using the ANOVA-like differential expression (ALDEx2) test, which considers the compositional nature of microbiota datasets. *Vertical dashed lines* indicate fold-change cutoffs  $\geq 1.5$ . *Horizontal dashed lines* show p-value cutoffs for comparisons (nominal  $p \leq 0.05$ ). *Blue circles in the upper left quadrant* denote taxa enriched in MEMuc relative to Chol while *red circles in the upper right quadrants* denote taxa enriched in Chol relative to MEMuc. No significant taxa were identified in comparing Chol to MEDisc or Gran.

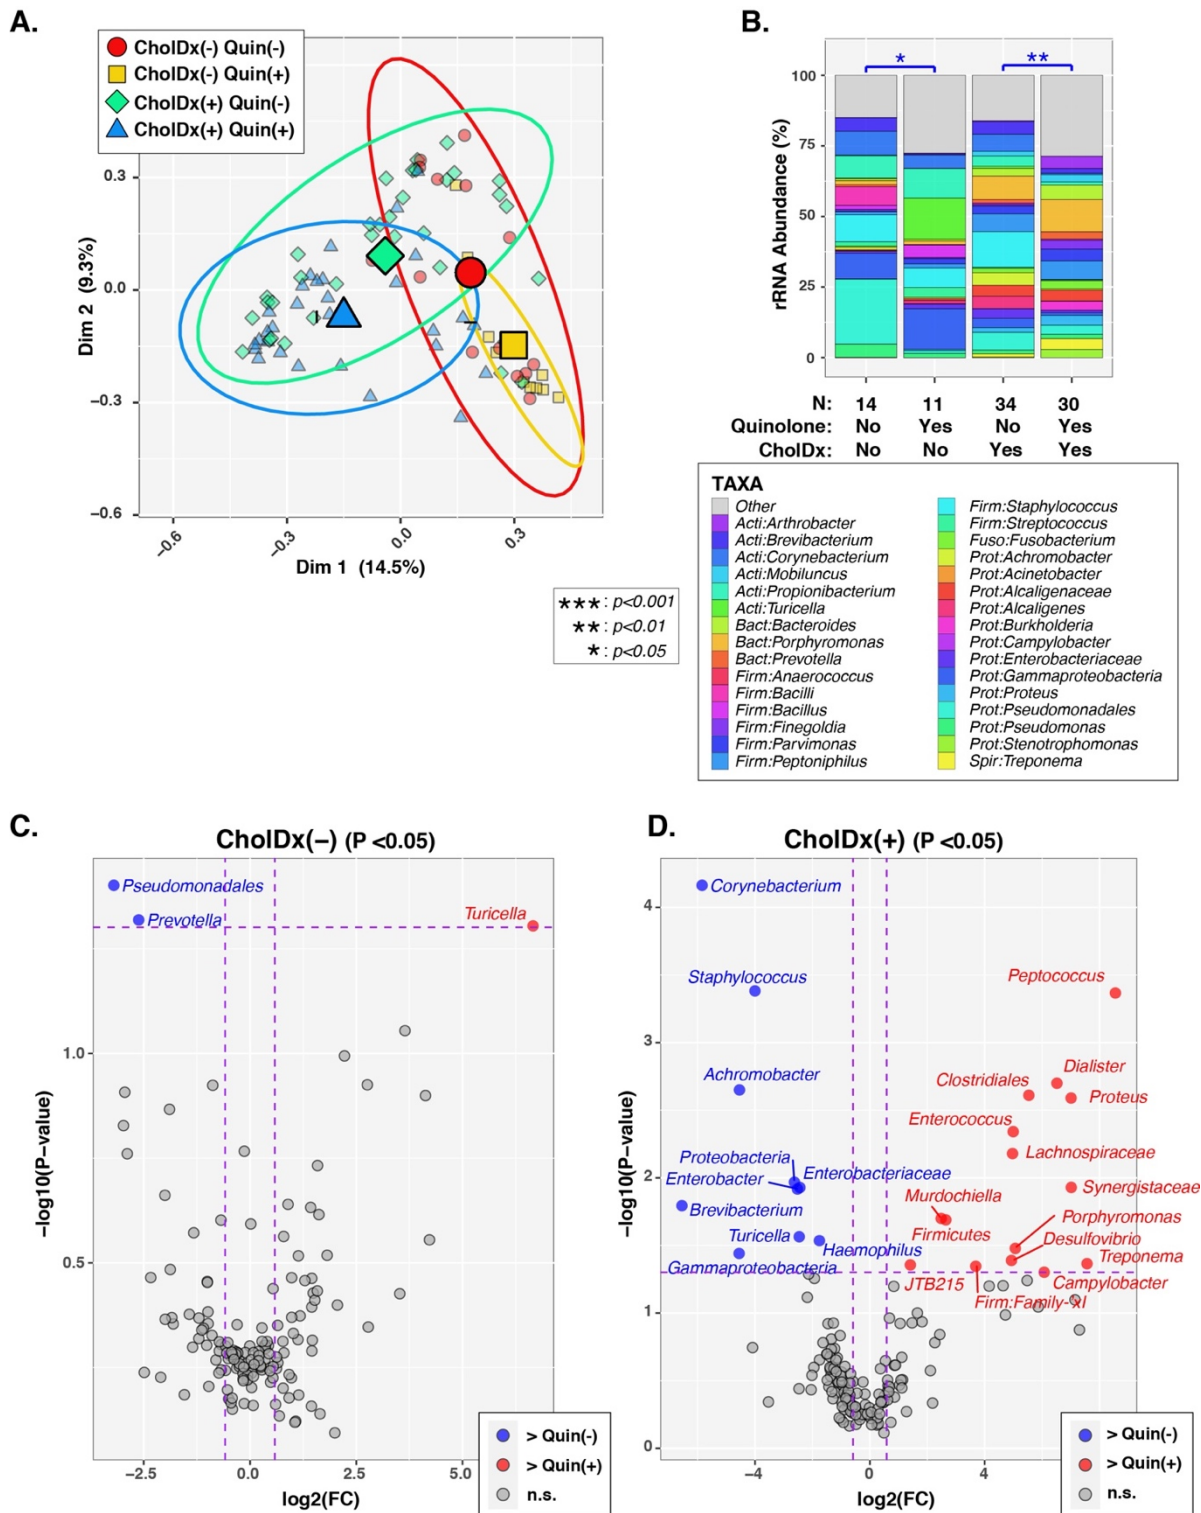

**Figure S4. Effects of quinolone use on ME microbiota in subjects with and without cholesteatoma diagnosis. Panel A.** Principal coordinates (PC) plots coded by cholesteatoma diagnosis [CholDx(+) vs. CholDx(-)] and quinolone use [Quin(+) vs. Quin(-)]. *Smaller symbols* designate individual subjects while *larger symbols* represent group means along both PC axes. Ellipses designate 90% confidence level for a multivariate t-distribution. **Panel B.** Barcharts summarizing the mean relative abundances of predominant taxa ( $>2\%$ RA) in each group; rarer taxa are grouped into the “Other” category. Results of PERMANOVA tests are indicated above barcharts; tests were conducted only for 1) CholDx(-)/Quin(-) vs. CholDx(-)/Quin(+) and 2) CholDx(+)/Quin(-) vs. CholDx(+)/Quin(+) subjects. *Blue lines/symbols* indicate p-values for pairwise comparisons. **Panel C.** Individual taxa differing between CholDx(-)/Quin(-) and CholDx(-)/Quin(+) subjects, assessed by Aldex2 and adjusting for age and sample-type. **Panel D.** Individual taxa differing between CholDx(-)/Quin(-) and CholDx(+)/Quin(+) subjects, assessed by Aldex2 and adjusting for age and sample-type. *Vertical dashed lines* indicate fold-change cutoffs  $\geq 1.5$ . *Horizontal dashed lines* show p-value cutoffs for comparisons (nominal  $p \leq 0.05$ ). *Blue circles in the upper left quadrants* denote taxa enriched in Quin(-) subjects while *red circles in the upper right quadrants* denote taxa enriched in Quin(+) subjects.

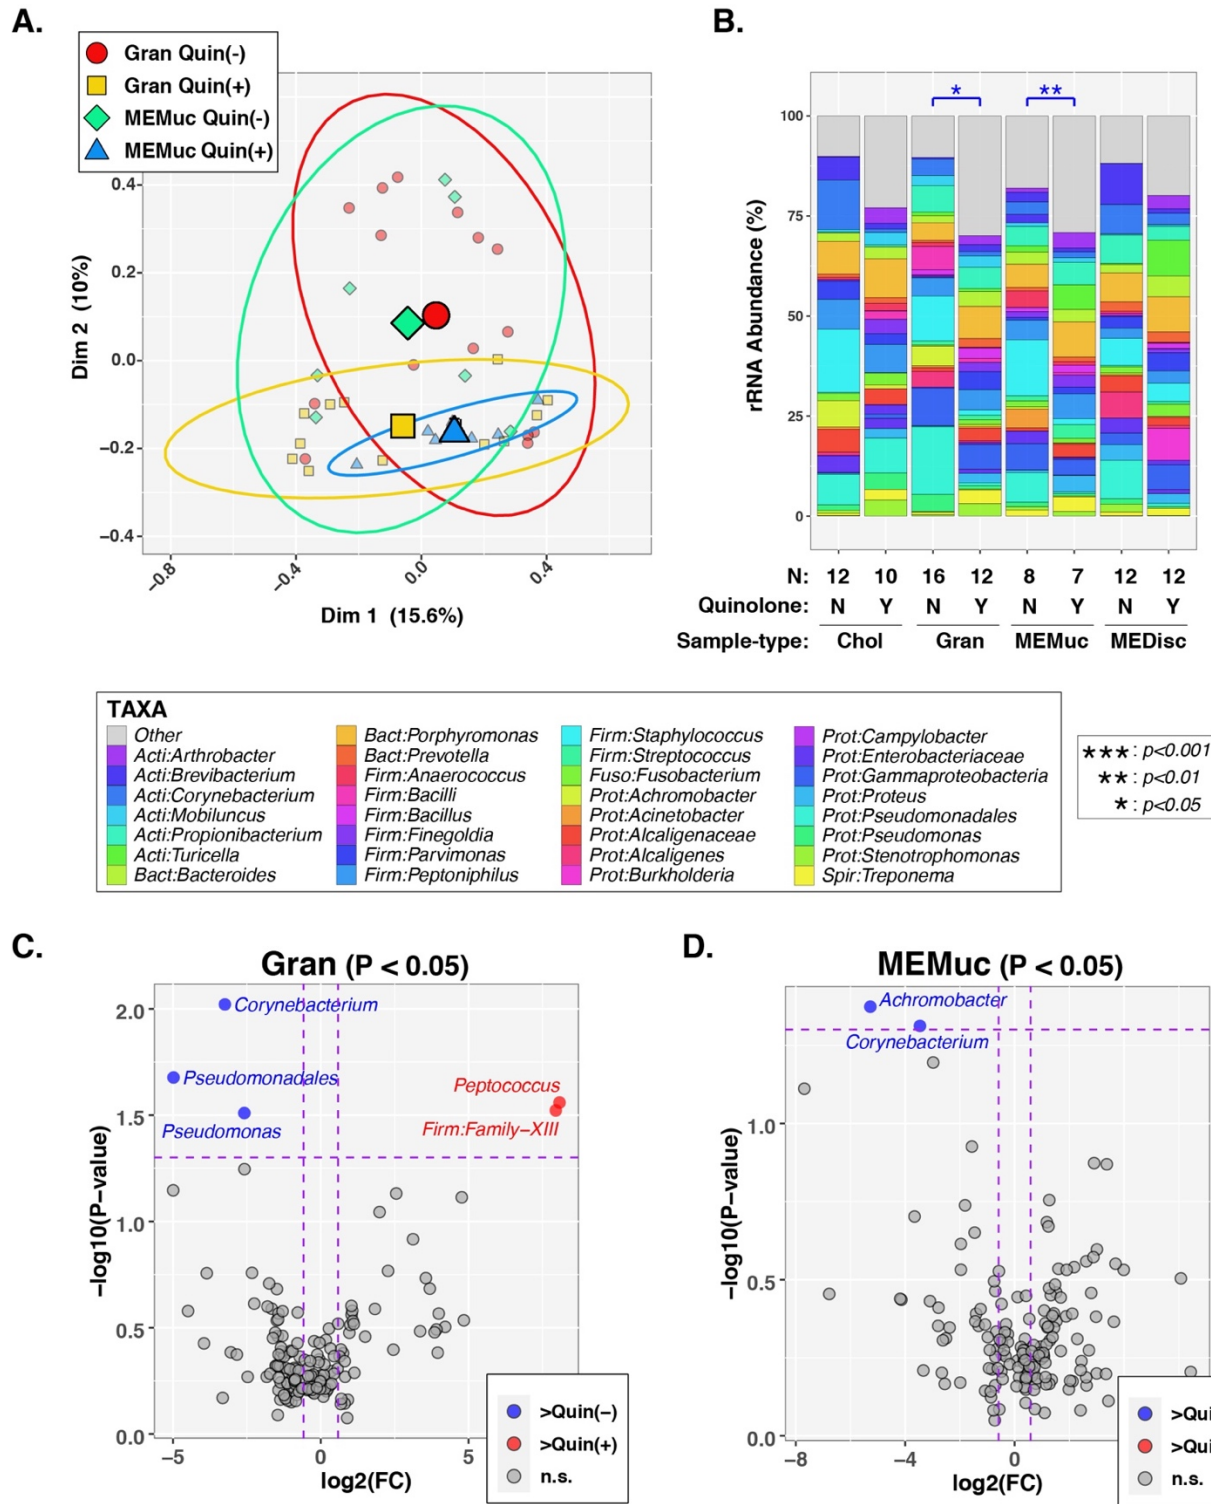

**Figure S5. Effects of quinolone use on middle ear microbiota in subjects, stratified by sample-type.** *Panel A.* Principal coordinates (PC) plots coded by sample-type (Gran vs. MEMuc) and quinolone use [Quin(+) vs. Quin(-)]. *Smaller symbols* designate individual subjects while *larger symbols* represent group means along both PC axes. *Ellipses* designate 90% confidence level for a multivariate t-distribution. *Panel B.* Bar charts summarizing the mean relative abundances of predominant taxa (>2%RA) in each group; rarer taxa are grouped into the “Other” category. Results of PERMANOVA tests are indicated above bar charts; tests were conducted only between Quin(+) and Quin(-) subjects within each sample-type category. *Blue lines/symbols* indicate p-values for pairwise comparisons. *Panel C.* Individual taxa differing between Gran/Quin(+) and Gran/Quin(-) subjects, assessed by Aldex2 and adjusting for age and cholesteatoma diagnosis. *Panel D.* Individual taxa differing between MEMuc/Quin(+) and MEMuc/Quin(-) subjects, assessed by Aldex2 and adjusting for age and cholesteatoma diagnosis. *Vertical dashed lines* indicate fold-change cutoffs  $\geq 1.5$ . *Horizontal dashed lines* show p-value cutoffs for comparisons (nominal  $p \leq 0.05$ ). *Blue circles in the upper left quadrants* denote taxa enriched in Quin(-) subjects while *red circles in the upper right quadrants* denote taxa enriched in Quin(+) subjects.
